# Supplementary material for: Non-Invasive Assessment of Locally Overexpressed Human Adenosine 2A Receptors in the Heart of Transgenic Mice
Source: MDPI journal article supplement (doi:10.3390/ijms23031025), 2022-01-18
Supplement: s1 [file s1]

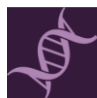

Supplementary Information

# Non-invasive assessment of a local overexpressed human Adenosine 2A Receptor with [<sup>18</sup>F]FLUDA in the heart of a transgenic mouse model by PET

Daniel Gündel <sup>1\*</sup>, Thu Hang Lai <sup>1,2</sup>, Sladjana Dukic-Stefanovic <sup>1</sup>, Rodrigo Teodoro <sup>1</sup>, Winnie Deuther-Conrad <sup>1</sup>, Magali Toussaint <sup>1</sup>, Klaus Kopka <sup>1,7</sup>, Rareș-Petru Moldovan <sup>1</sup>, Peter Boknik <sup>3</sup>, Britt Hofmann <sup>4</sup>, Ulrich Gergs <sup>5</sup>, Joachim Neumann <sup>5, #</sup> and Peter Brust <sup>1, 6, #</sup>

- <sup>1</sup> Helmholtz-Zentrum Dresden-Rossendorf, Institute of Radiopharmaceutical Cancer Research, Department of Neuroradiopharmaceuticals, Research Site Leipzig, 04813 Leipzig, Germany; d.guendel@hzdr.de (D.G.), t.lai@hzdr.de (T.H.L.), s.dukic-stefanovic@hzdr.de (S.D.-S.), r.teodoro@hzdr.de (R.T.), w.deuther-conrad@hzdr.de (W.D.-C.), m.toussaint@hzdr.de (M.T.), k.kopka@hzdr.de (K.K.); r.moldovan@hzdr.de (R.P.M.); p.brust@hzdr.de (P.B.)
  - <sup>2</sup> Department of Research and Development, ROTOP Pharmaka Ltd., Dresden, Germany; t.lai@hzdr.de (T.H.L.)
  - <sup>3</sup> University of Muenster, Institute for Pharmacology and Toxicology, Muenster, Germany; boknik@uni-muenster.de (P.Bo.)
  - <sup>4</sup> Martin Luther University of Halle-Wittenberg, Medical Faculty, Cardiac Surgery, Halle, Germany; britt.hofmann@uk-halle.de (B.H.)
  - <sup>5</sup> Martin Luther University of Halle-Wittenberg, Institute for Pharmacology and Toxicology, Halle, Germany; Ulrich.gergs@medizin.uni-halle.de (U.G.), joachim.neumann@medizin.uni-halle.de (J.N.)
  - <sup>6</sup> The Lübeck Institute of Experimental Dermatology, University Medical Center Schleswig-Holstein, 23562 Lübeck, Germany; p.brust@hzdr.de (P.B.)
  - <sup>7</sup> Technical University Dresden, School of Science, Faculty of Chemistry and Food Chemistry, Dresden, Germany (K.K.)
- \* Correspondence: d.guendel@hzdr.de; Tel.: +49 341 234179 4615  
# authors contributed equally

**Citation:** Gündel, D.; Lai, T.H.; Dukic-Stefanovic, S.; Teodoro, R.; Deuther-Conrad, W.; Toussaint, M.; Kopka, K.; Moldovan, R.-P.; Boknik, P.; Hofmann, B.; et al. Non-Invasive Assessment of Locally Overexpressed Human Adenosine 2A Receptors in the Heart of Transgenic Mice. *Int. J. Mol. Sci.* **2022**, *23*, 1025. <https://doi.org/10.3390/ijms23031025>

Academic Editor: Katia Varani

Received: 21 December 2021

Accepted: 14 January 2022

Published: 18 January 2022

**Publisher's Note:** MDPI stays neutral with regard to jurisdictional claims in published maps and institutional affiliations.

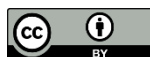

**Copyright:** © 2022 by the authors. Submitted for possible open access publication under the terms and conditions of the Creative Commons Attribution (CC BY) license (<https://creativecommons.org/licenses/by/4.0/>).

## Table of content:

**Figure S1:** *In vitro* binding study of [<sup>18</sup>F]FLUDA to control tissue cryosections (muscle and lung).

**Figure S2:** Dynamic PET imaging analysis of the [<sup>18</sup>F]FLUDA in the blood compartment (Left ventricle) and the radiotracer uptake of the myocardium in WT (n = 6) and A<sub>2A</sub>-AR TG (n = 6) mice.

**Figure S3:** *Ex vivo* autoradiographic analysis of [<sup>18</sup>F]FLUDA accumulation in heart.

**Figure S4:** Dynamic PET imaging analysis of the [<sup>18</sup>F]FLUDA in different tissues.

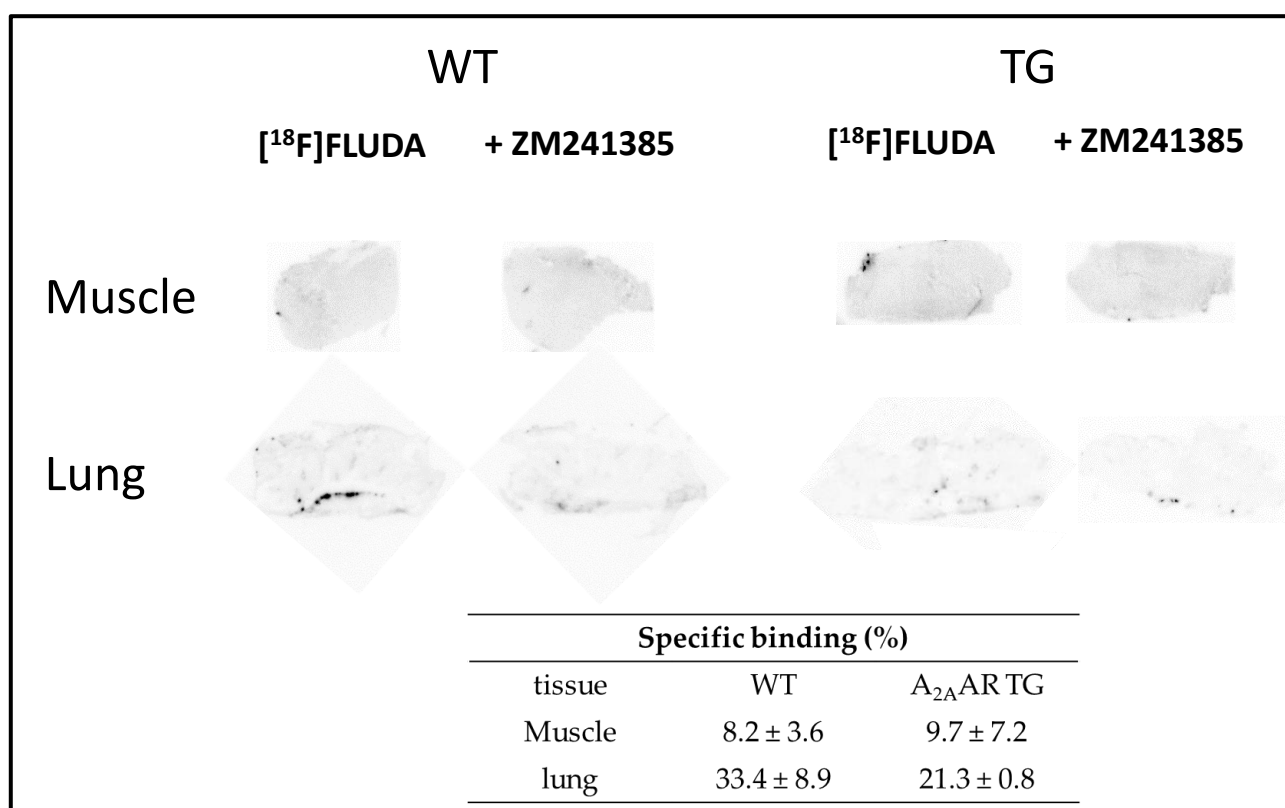

**Figure S1.** *In vitro* binding study of [<sup>18</sup>F]FLUDA to control tissue cryosections (muscle and lung) with and without 10 μM ZM241385 (each n = 2) to determine the specific binding of the radioligand.

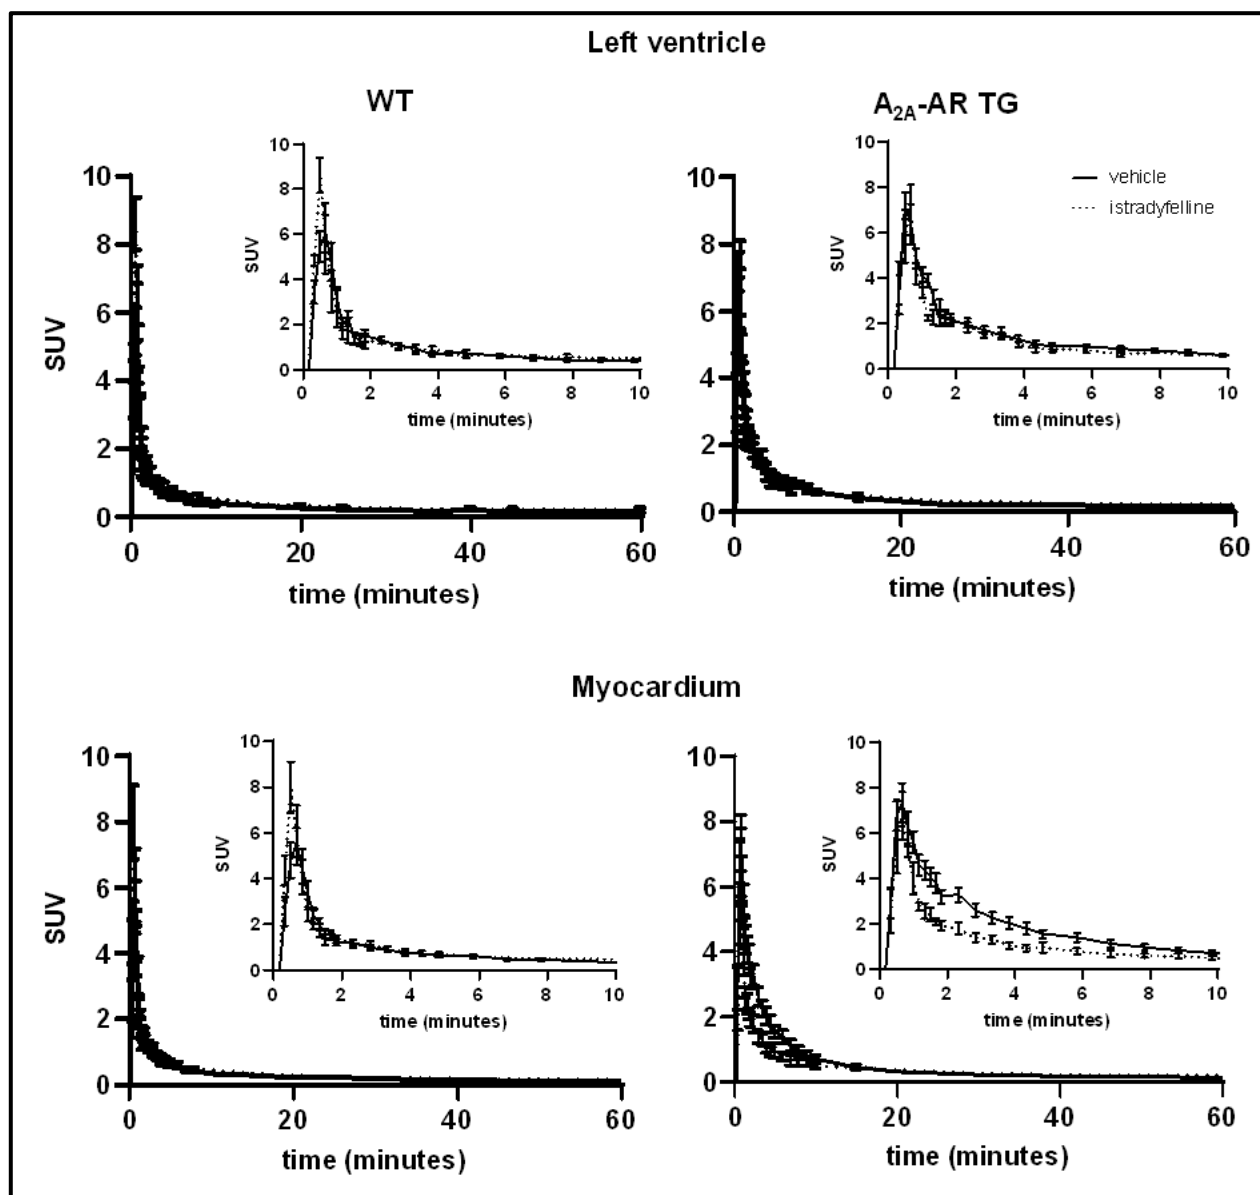

**Figure S2.** Dynamic PET imaging analysis of the [ $^{18}\text{F}$ ]FLUDA concentration in the blood compartment (Left ventricle) and the radio-tracer uptake of the myocardium in WT ( $n = 6$ ) and  $\text{A}_{2\text{A}}\text{-AR TG}$  ( $n = 6$ ) mice. The time activity curves after radiotracer administration are represented in mean activity concentrations as standardized uptake values ( $\text{SUV}_{\text{mean}} \pm \text{SEM}$ ) in the delineated volume of interests of indicated tissue regions. Mice were pre-treated with vehicle or 1 mg/kg bodyweight istradefylline 10 minutes prior radiotracer application.

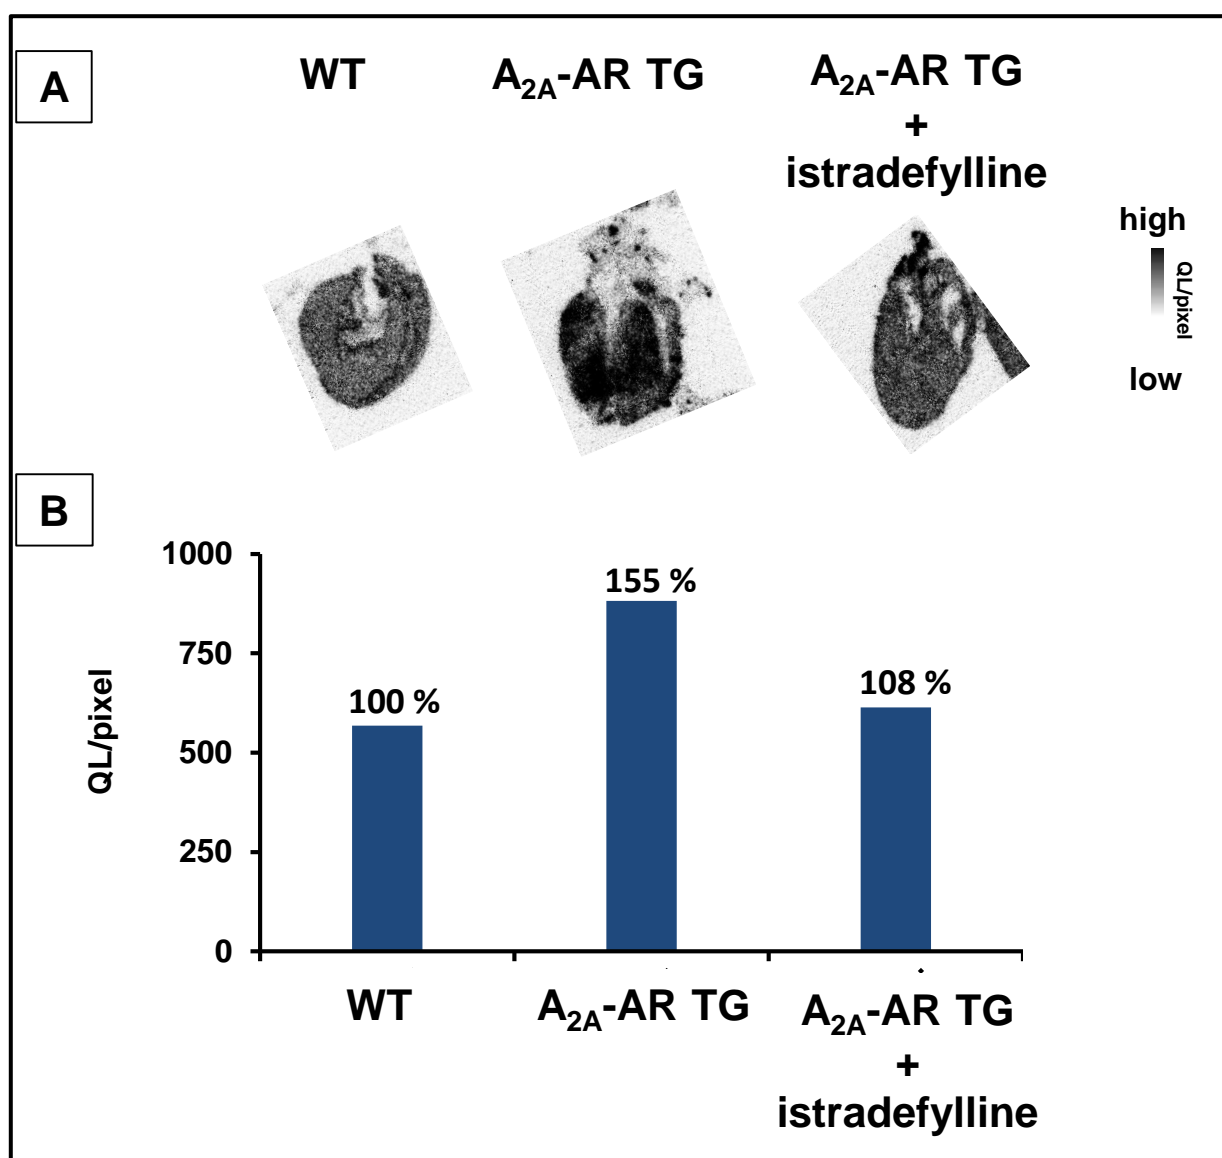

**Figure S3.** Exemplary *ex vivo* autoradiographic images (A) and the according analysis (B) of  $[^{18}\text{F}]$ FLUDA accumulation in heart at 15 min p.i. of the radioligand in cryosections of murine heart (16  $\mu\text{m}$ ) of WT and  $A_{2A}$ -AR TG (with and without preadministration of istradefylline,  $n=1$ ).

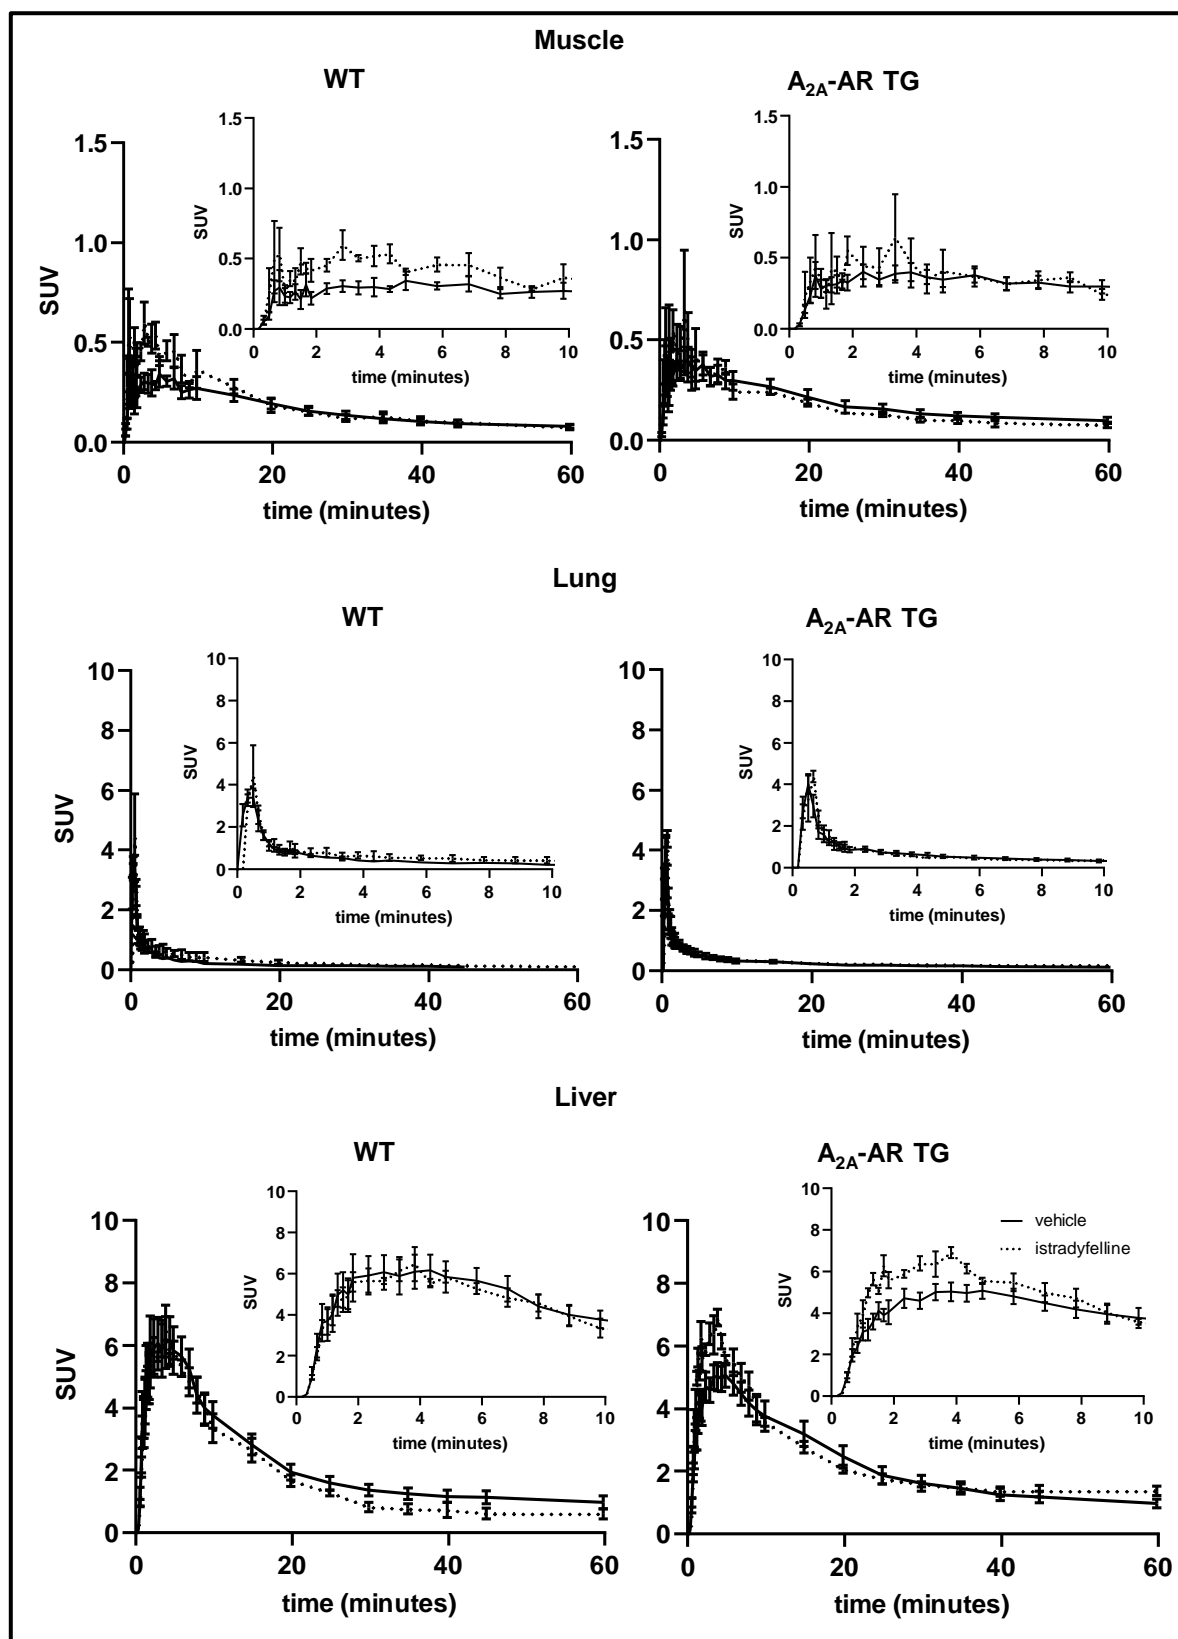

**Figure S4.** Dynamic PET imaging analysis of the [ $^{18}\text{F}$ ]FLUDA concentration in the blood and of the radiotracer uptake of different tissues in WT ( $n = 6$ ) and  $A_{2A}$ -AR TG ( $n = 6$ ) mice. The time activity curves after radiotracer administration are represented in mean activity concentrations as standardized uptake values ( $\text{SUV}_{\text{mean}} \pm \text{SEM}$ ) in the delineated volume of interests of indicated tissue regions. Mice were pre-treated with vehicle or 1 mg/kg bodyweight istradefylline 10 minutes prior radiotracer application.

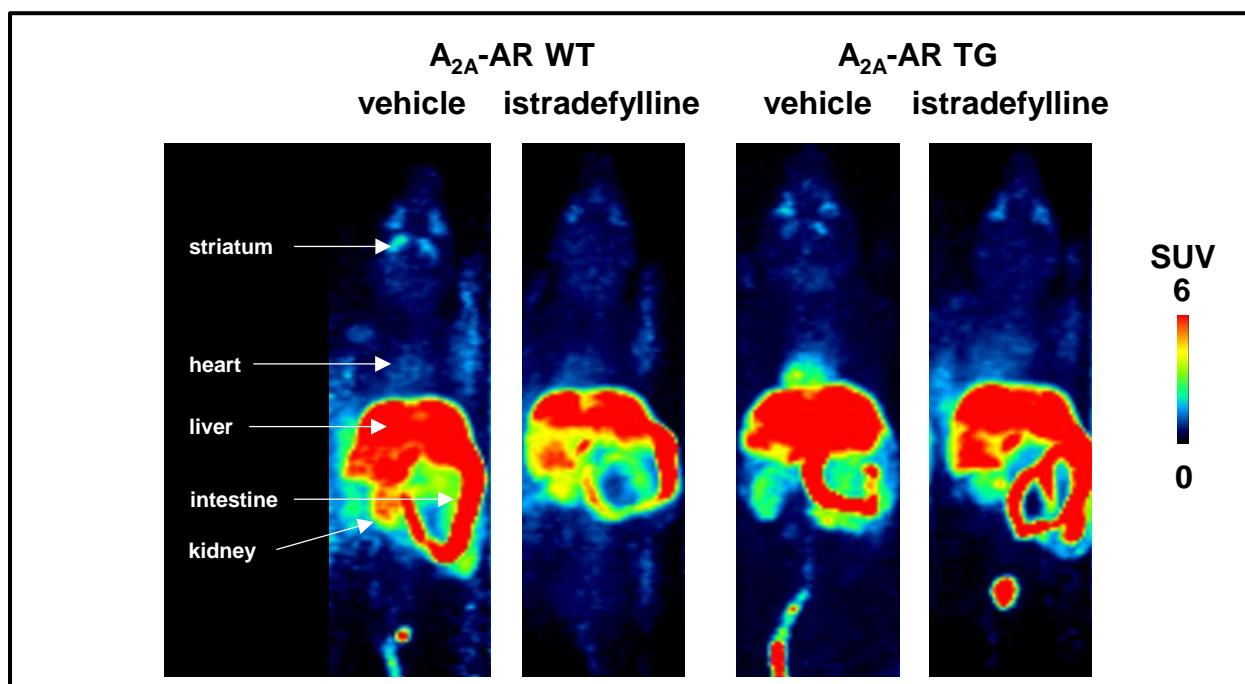

**Figure S5.** Representative averaged whole body maximum intensity projections (MIPs) from 1 to 10 min p.i. of the PET acquisition of [<sup>18</sup>F]FLUDA in WT and A<sub>2A</sub>-AR TG with or without preadministration of istradefylline.
